# Supplementary material for: A study on a broadband photodetector based on hybrid 2D copper oxide/reduced graphene oxide
Source: Royal Society of Chemistry journal article supplement (doi:10.1039/d3na00796k), 2024-01-01
Supplement: d3na00796k1.pdf [file d3na00796k1.pdf]

## A STUDY ON BROADBAND PHOTODETECTOR BASED ON HYBRID 2D COPPER OXIDE/ REDUCED GRAPHENE OXIDE

Duc Anh Ngo<sup>a,c</sup>, Nhat Minh Nguyen<sup>a,c</sup>, Cong Khanh Tran<sup>a,c</sup>, Thi Thanh Van Tran<sup>a,c</sup>, Nhu Hoa Thi Tran<sup>a,b,c</sup>, Thi Thu Thao Bui<sup>a,c</sup>, Le Thai Duy<sup>a,c</sup>, Vinh Quang Dang<sup>\*a,b,c</sup>.

<sup>a</sup> Faculty of Materials Science and Technology, University of Science, 227 Nguyen Van Cu Street, District 5, Ho Chi Minh City 700000, Vietnam

<sup>b</sup> Center for Innovative Materials and Architectures (INOMAR), Ho Chi Minh City 700000, Vietnam

<sup>c</sup> Vietnam National University, Ho Chi Minh City (VNU-HCM) 700000, Vietnam

\* Correspondence. E-mail: [vinhquangntmk@gmail.com](mailto:vinhquangntmk@gmail.com)

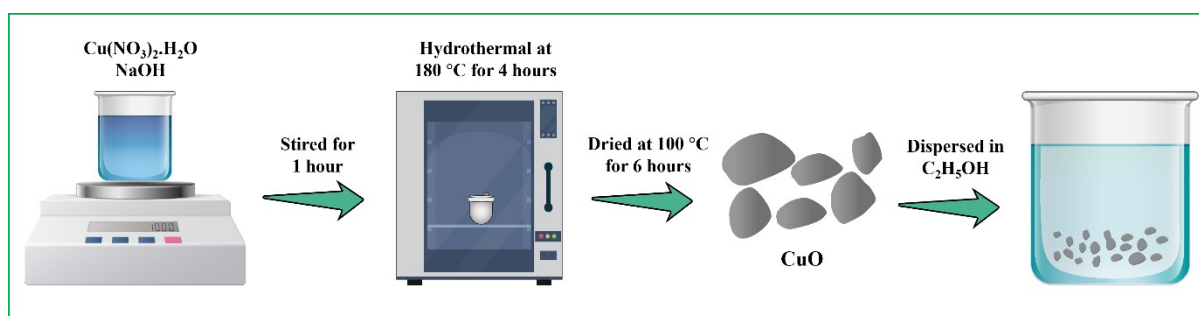

**Figure S1.** Synthesis process of 2D CuO dispersion.

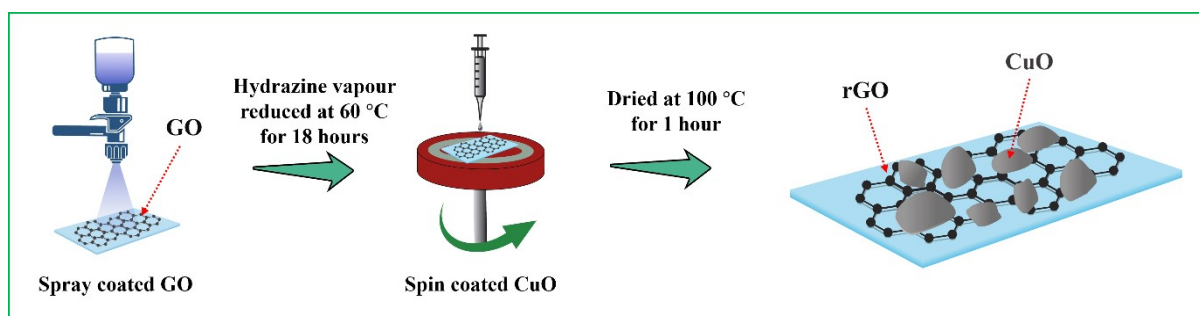

**Figure S2.** Synthesis process of 2D CuO/rGO hybrid thin film.

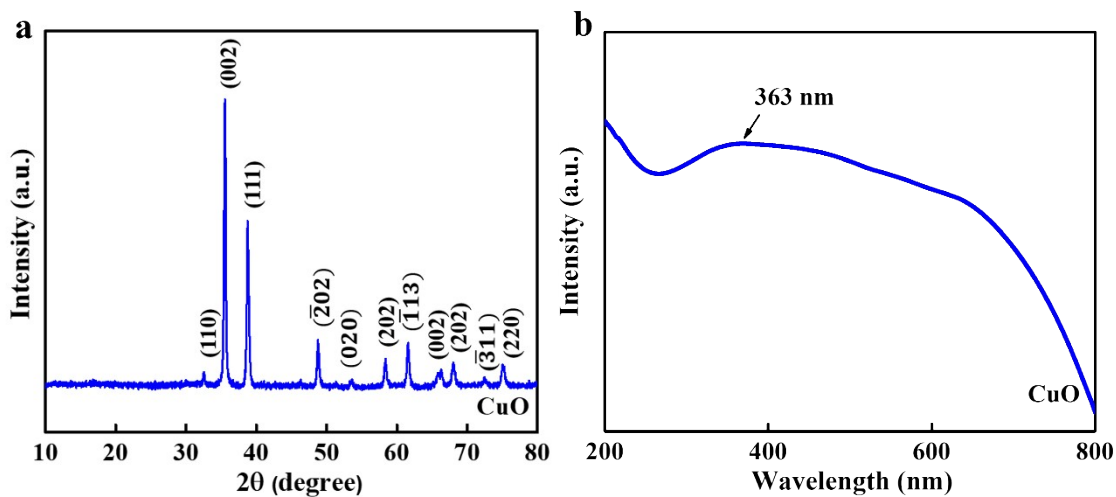

Figure S3. (a) XRD pattern and (b) UV-vis spectrum of 2D CuO sample

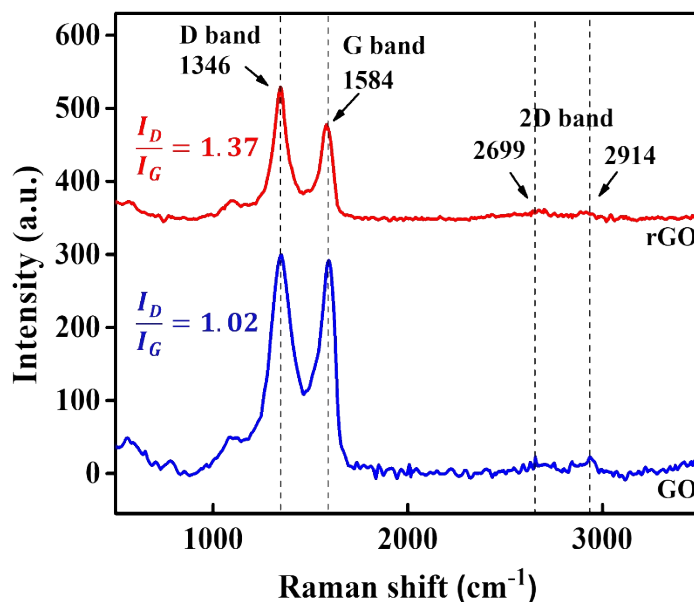

Figure S4. Raman spectra of GO and rGO samples

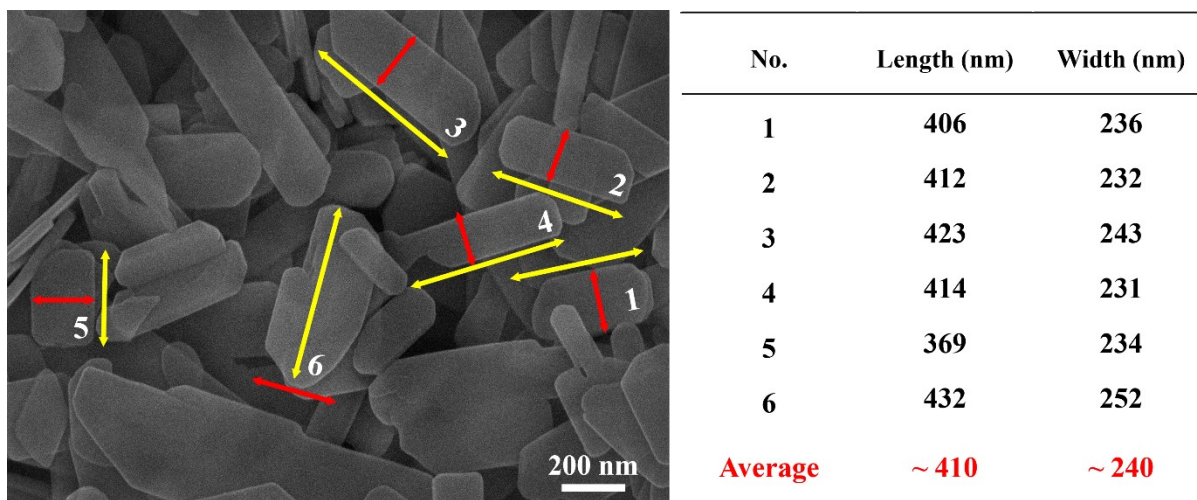

Figure S5. SEM image and size statistics of 2D CuO nanoplates

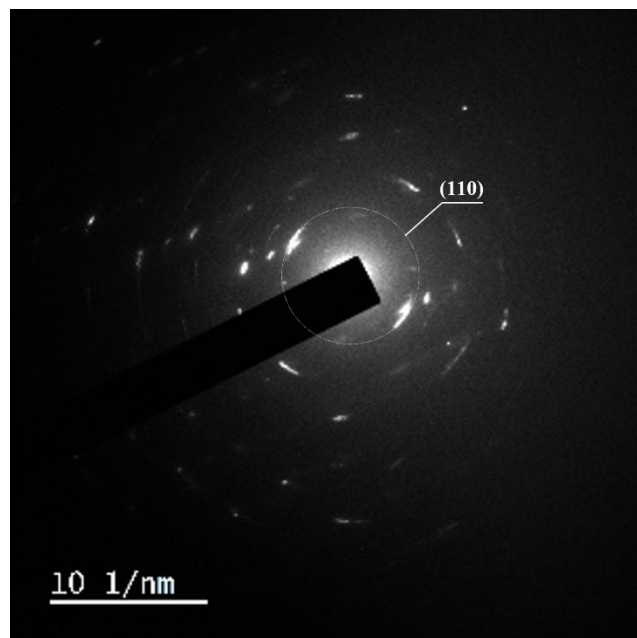

**Figure S6.** SAED pattern of 2D CuO/rGO

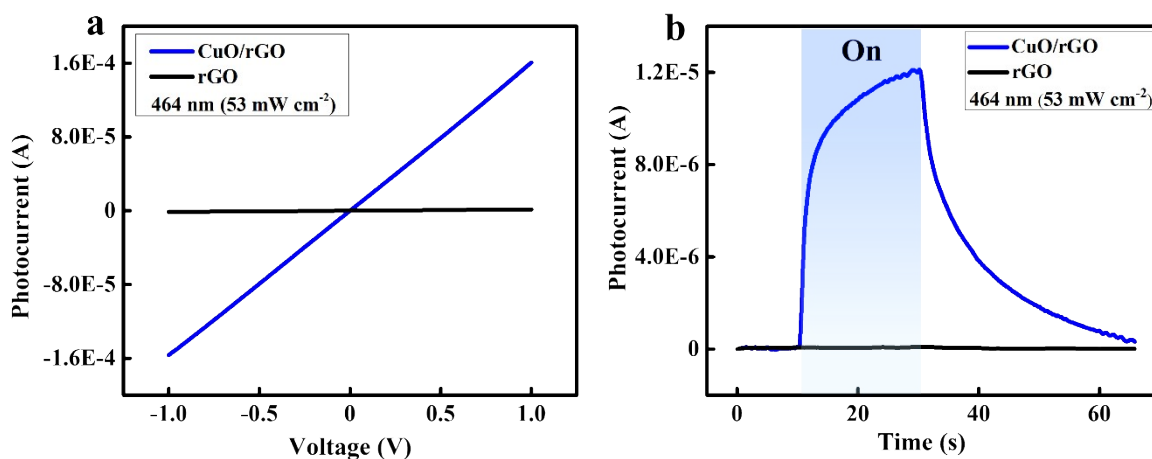

**Figure S7.** (a) I-V and (b) I-t characteristics of rGO and 2D CuO/rGO photodetectors under 464 nm light

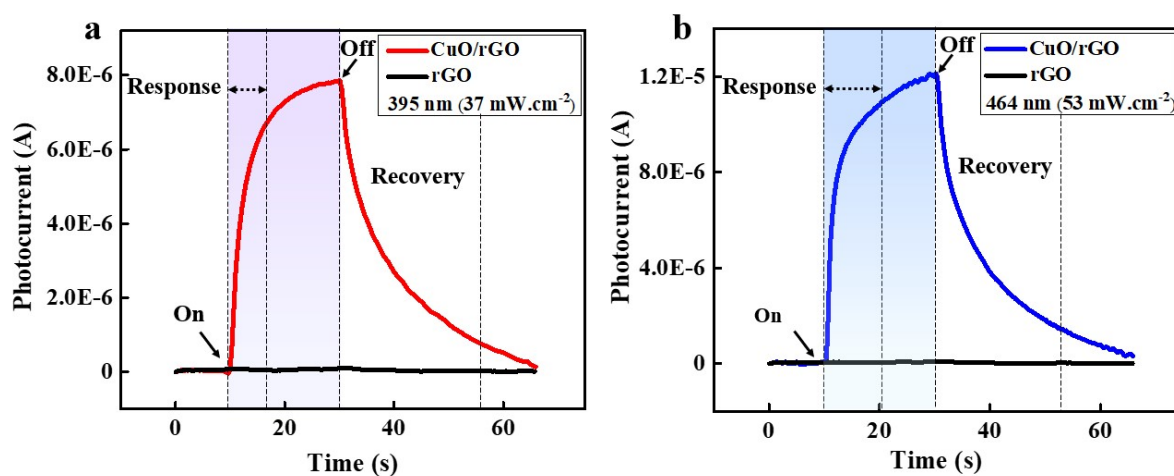

**Figure S8.** Response and recovery time of a hybrid photodetector under exposure to (a) 395 nm and (b) 464 nm lights

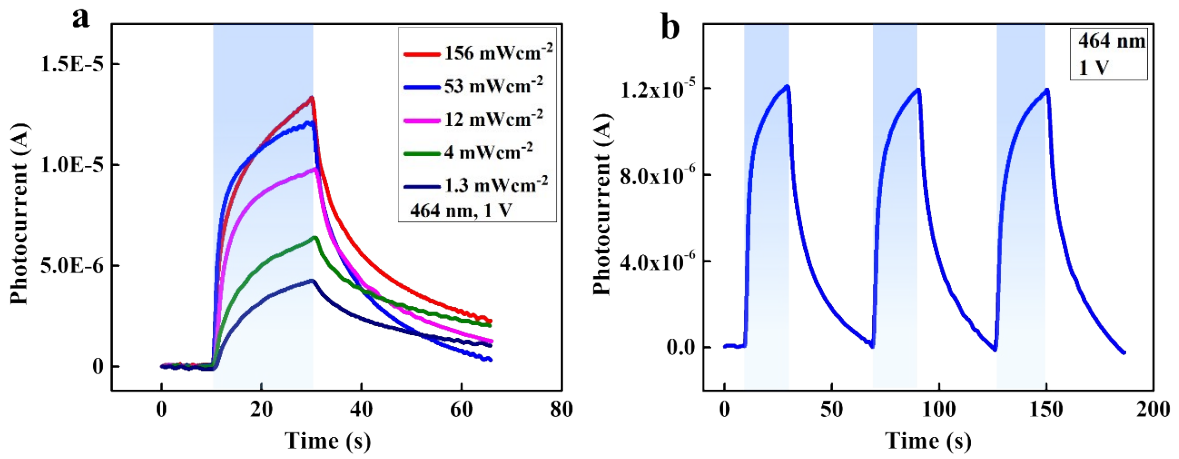

**Figure S9.** (a) *I*-*t* curves and (b) the repeatability of a hybrid photodetector under 464 nm light

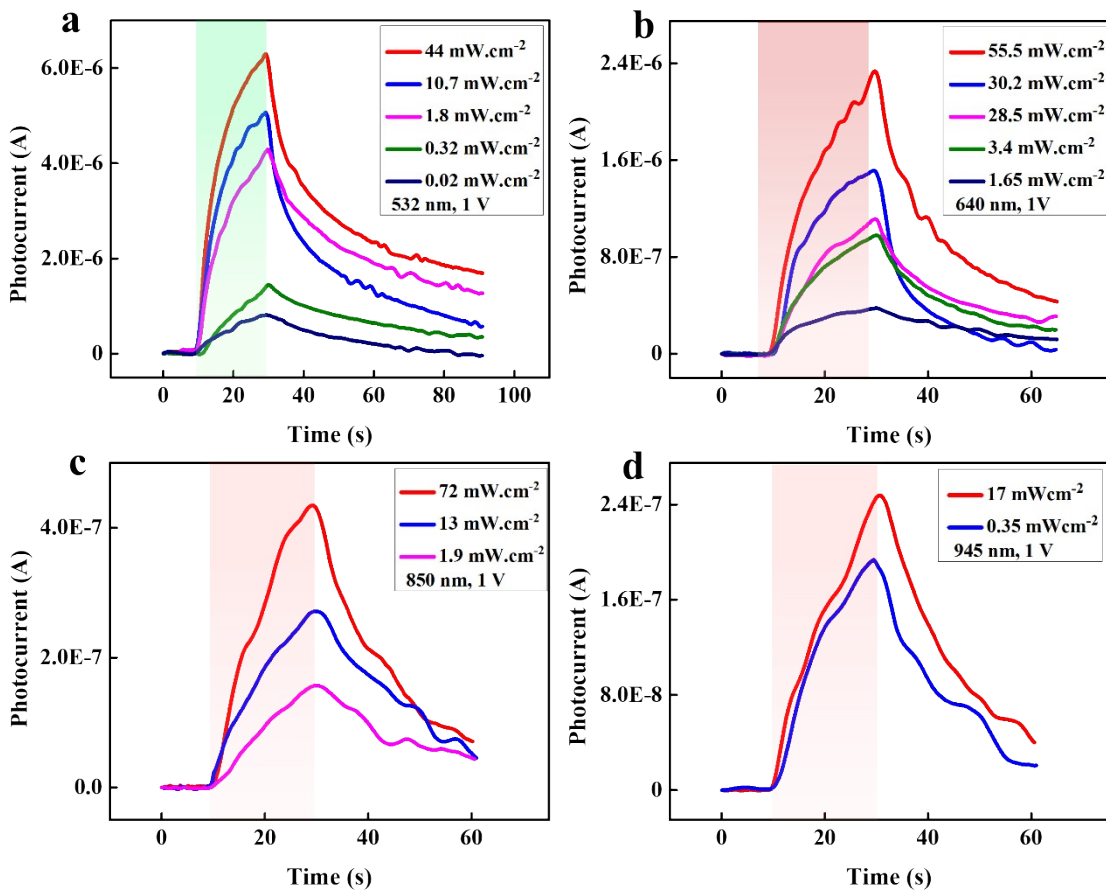

**Figure S10.** *I*-*t* curves of the hybrid device under exposure to light at wavelengths of (a) 532 nm, (b) 640 nm, (c) 850 nm, and (d) 945 nm.

The hybrid device generated the highest photocurrents of 6.3, 2.3, 0.43, and 0.25  $\mu\text{A}$  when excited by the 532-, 640-, 850-, and 945-nm wavelengths, respectively. When the light was ON, the photocurrent immediately increased, and when the light was OFF, the photocurrent decreased. Notably, it gradually decreased as increasing the light intensity.

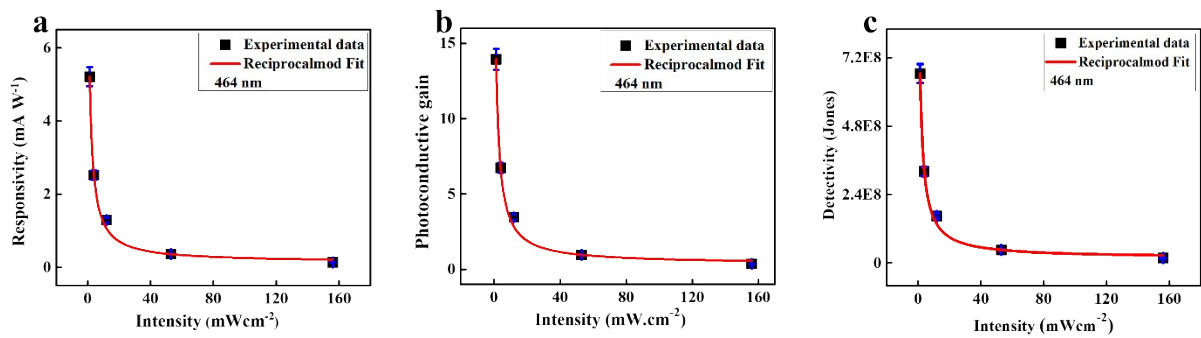

**Figure S11.** (a) Responsivity, (b) photoconductive gain and (c) detectivity of 2D CuO/rGO device including reciprocal function fitting lines with error bar.
